20. Vinik AI, Park TS, Stansberry KB, Pittenger GL: Diabetic neuropathies. *Diabetologia* 2000; 43:957-73
21. Richardson JK, Jamieson SC: Cigarette smoking and ulnar mononeuropathy at the elbow. *Am J Phys Med Rehabil* 2004; 83:730-4
22. Upton AR, McComas AJ: The double crush in nerve entrapment syndromes. *Lancet* 1973; 2:359-62
23. Cornblath DR, Mendell JR, Kissel JT: Evaluation of the Patient with Peripheral Neuropathy, The Challenges, Diagnosis and Management of Peripheral Nerve Disorders. Edited by Mendell JR, Kissel JT, Cornblath DR. New York, Oxford University Press, 2001, pp 3-9
24. Brull R, McCartney CJ, Chan VW, El-Beheiry H: Neurological complications after regional anesthesia: Contemporary estimates of risk. *Anesth Analg* 2007; 104:965-74
25. Lederman RJ, Breuer AC, Hanson MR, Furlan AJ, Loop FD, Cosgrove DM, Estafanous FG, Greenstreet RL: Peripheral nervous system complications of coronary artery bypass graft surgery. *Ann Neurol* 1982; 12:297-301
26. Casscells CD, Lindsey RW, Ebersole J, Li B: Ulnar neuropathy after median sternotomy. *Clin Orthop Relat Res* 1993; 291:259-65
27. Grocott HP, Clark JA, Homi HM, Sharma A: "Other" neurologic complications after cardiac surgery. *Semin Cardiothorac Vasc Anesth* 2004; 8:213-26
28. Sharma AD, Parmley CL, Sreeram G, Grocott HP: Peripheral nerve injuries during cardiac surgery: Risk factors, diagnosis, prognosis, and prevention. *Anesth Analg* 2000; 91:1358-69
29. Parks BJ: Postoperative peripheral neuropathies. *Surgery* 1973; 74:348-57
30. Blitt CD, Kaufer-Bratt C, Ashby J, Caillet JR: QA program reveals safety issues, promotes development of guidelines: Arizona practice is model. *J Clin Monit* 1995; 11:76-9
31. LeBard SE: Pediatrics, Positioning in Anesthesia & Surgery, 3rd Edition. Edited by Martin JT, Warner MA. Philadelphia, W.B. Saunders, 1997, pp 251-66
32. Practice advisory for the prevention of perioperative peripheral neuropathies: A report by the American Society of Anesthesiologists Task Force on Prevention of Perioperative Peripheral Neuropathies. *ANESTHESIOLOGY* 2000; 92:1168-82
33. Fritzlen T, Kremer M, Biddle C: The AANA Foundation Closed Malpractice Claims Study on nerve injuries during anesthesia care. *AANA J* 2003; 71:347-52
34. Warner MA, Warner DO, Harper CM, Schroeder DR, Maxson PM: Ulnar neuropathy in medical patients. *ANESTHESIOLOGY* 2000; 92:613-5

## ■ ANESTHESIOLOGY REFLECTIONS

### Darwin Etherizes Venus Flytraps

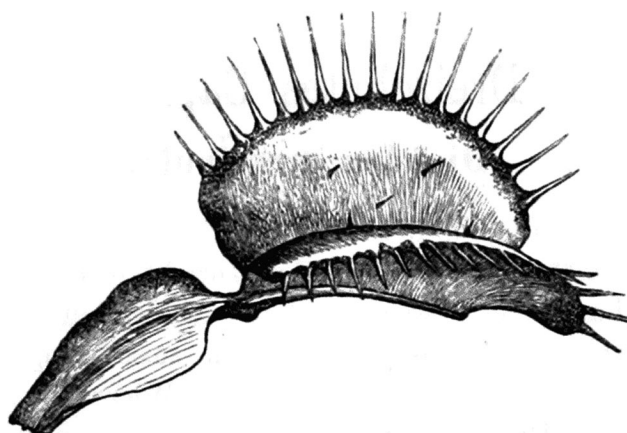

In his 1875 text *Insectivorous Plants*, naturalist Charles Darwin noted that the "plant, commonly called Venus' fly-trap, from the rapidity and force of its movements, is one of the most wonderful in the world." While investigating anesthetics' effects on the botanical carnivore's leaf-closing, he tried chloroform and then ether vapors. Using a 2-oz. vessel, the naturalist determined that the flytrap's leaf required 24 hr to recover sensibility from 20 min exposure to "15 minims" of ether, but only 52 min to recover from 3 min exposure to "10 drops" in a larger bottle. Darwin conceded that he did not know whether "the larger doses of . . . ether, which caused the leaves to close slowly, acted on the sensitive filaments or on the leaf itself. . . ." His son George provided the illustration above of an unclosed leaf of *Dionaea muscipula*, whose Latin name actually means "Venus mousetrap." (Copyright © the American Society of Anesthesiologists, Inc. This image appears in the *Anesthesiology Reflections* online collection available at [www.anesthesiology.org](http://www.anesthesiology.org).)

George S. Bause, M.D., M.P.H., Honorary Curator, ASA's Wood Library-Museum of Anesthesiology, Park Ridge, Illinois, and Clinical Associate Professor, Case Western Reserve University, Cleveland, Ohio. [UJYC@aol.com](mailto:UJYC@aol.com).
